# Supplementary material for: Structural and Functional Evolution of the Trace Amine-Associated Receptors TAAR3, TAAR4 and TAAR5 in Primates
Source: PubMed Central journal article supplement (PMC2886124; doi:10.1371/journal.pone.0011133), 2010-06-15
Supplement: pone.0011133.s009.pdf [file pone.0011133.s009.pdf]

|                                                                        |                           | TAAR3       |                                                                                 | TAAR4               |                                                                                                         | TAAR5       |                                                                              |
|------------------------------------------------------------------------|---------------------------|-------------|---------------------------------------------------------------------------------|---------------------|---------------------------------------------------------------------------------------------------------|-------------|------------------------------------------------------------------------------|
|                                                                        |                           | length      | source                                                                          | length              | source                                                                                                  | length      | source                                                                       |
| <b>Mammalia</b><br><b>Protheria</b><br><i>Ornithorhynchus anatinus</i> | platypus                  | full length | NCBI <i>Ornithorhynchus anatinus</i> trace archive: gnl ti 750149729 and others | full length         | NCBI <i>Ornithorhynchus anatinus</i> trace archive: gnl ti 1246961726 and others                        |             |                                                                              |
| <b>Metatheria</b><br><i>Monodelphis domestica</i> *                    | gray short-tailed opossum | full length | NCBI <i>Monodelphis domestica</i> trace archive: gnl ti 397122803 and others    | full length 3x      | NCBI <i>Monodelphis domestica</i> trace archive: gnl ti 473024684 and others                            | full length | NCBI <i>Monodelphis domestica</i> trace archive: gnl ti 343429597 and others |
| <i>Macropus eugenii</i>                                                | tammar wallaby            | full length | NCBI <i>Macropus eugenii</i> trace archive: gnl ti 1378047881 and others        | full length         | NCBI <i>Macropus eugenii</i> trace archive: gnl ti 1275406430 and others                                | aa8-end     | NCBI <i>Macropus eugenii</i> trace archive: gnl ti 976302676                 |
| <b>Eutheria</b><br><b>Afrotheria</b><br><i>Procavia capensis</i> *     | cape rock hyrax           | full length | NCBI <i>Procavia capensis</i> trace archive: gnl ti 1203593751 and others       | full length 3x      | NCBI accession: FJ372519, NCBI <i>Procavia capensis</i> trace archive: gnl ti 1203477241 and others     | full length | NCBI <i>Procavia capensis</i> trace archive: gnl ti 1295000815 and others    |
| <i>Loxodonta africana</i> *                                            | African savanna elephant  | full length | NCBI <i>Loxodonta africana</i> trace archive: gnl ti 1714433321 and others      | full length 2x      | NCBI accession: FJ372488 and NCBI <i>Loxodonta africana</i> trace archive: gnl ti 1695377756 and others | full length | NCBI <i>Loxodonta africana</i> trace archive: gnl ti 1865757347 and others   |
| <i>Elephas maximus</i>                                                 | asiatic elephant          |             |                                                                                 | aa63-317            | NCBI accession: FJ372465                                                                                |             |                                                                              |
| <i>Trichechus manatus</i>                                              | Caribbean manatee         |             |                                                                                 | aa13-315 (P)        | NCBI accession: FJ372528                                                                                |             |                                                                              |
| <i>Echinops telfairi</i> *                                             | lesser hedgehog tenrec    | full length | NCBI <i>Echinops telfairi</i> trace archive: gnl ti 682625873 and others        | full length 2x (1P) | NCBI <i>Echinops telfairi</i> trace archive: gnl ti 688316620 and others                                | full length | NCBI <i>Echinops telfairi</i> trace archive: gnl ti 659227110 and others     |
| <i>Orycteropus afer</i>                                                | aardvark                  |             |                                                                                 | aa14-310            | NCBI accession: FJ372504, FJ375205                                                                      |             |                                                                              |

|                                                                                        |                               |                       |                                                                              |                     |                                                                              |             |                                                                               |
|----------------------------------------------------------------------------------------|-------------------------------|-----------------------|------------------------------------------------------------------------------|---------------------|------------------------------------------------------------------------------|-------------|-------------------------------------------------------------------------------|
| <b><i>Xenarthra</i></b><br><i>Bradypus tridactylus</i>                                 | pale-throated sloth           |                       |                                                                              | aa14-299            | NCBI accession: FJ372454                                                     |             |                                                                               |
| <i>Dasyopus novemcinctus</i> *                                                         | nine-banded Armadillo         | full length           | NCBI <i>Dasyopus novemcinctus</i> trace archive: gnl ti 601523115 and others | full length         | NCBI <i>Dasyopus novemcinctus</i> trace archive: gnl ti 567276505 and others | full length | NCBI <i>Dasyopus novemcinctus</i> trace archive: gnl ti 1810404270 and others |
| <i>Choloepus hoffmanni</i>                                                             | Hoffmann's two-fingered sloth | aa1-87 and aa219-end  | NCBI <i>Choloepus hoffmanni</i> trace archive: gnl ti 1316582719 and others  | full length         | NCBI <i>Choloepus hoffmanni</i> trace archive: gnl ti 1357779584 and others  | full length | NCBI <i>Choloepus hoffmanni</i> trace archive: gnl ti 1315053175 and others   |
| <hr style="border-top: 1px dashed black;"/>                                            |                               |                       |                                                                              |                     |                                                                              |             |                                                                               |
| <b><i>Laurasiatheria</i></b><br><b><i>Insectivora</i></b><br><i>Erinaceus concolor</i> | eastern European hedgehog     |                       |                                                                              | aa62-312            | NCBI accession: FJ372468                                                     |             |                                                                               |
| <i>Erinaceus europaeus</i>                                                             | western European hedgehog     | aa53-end              | NCBI <i>Erinaceus europaeus</i> trace archive: gnl ti 910108268 and others   | full length 2x (1P) | NCBI <i>Erinaceus europaeus</i> trace archive: gnl ti 932971697 and others   | full length | NCBI <i>Erinaceus europaeus</i> trace archive: gnl ti 970975651 and others    |
| <i>Sorex araneus</i> *                                                                 | European shrew                | full length           | NCBI <i>Sorex araneus</i> trace archive: gnl ti 885213269 and others         | full length 2x (1P) | NCBI <i>Sorex araneus</i> trace archive: gnl ti 893813953 and others         | full length | NCBI <i>Sorex araneus</i> trace archive: gnl ti 892168220 and others          |
| <i>Talpa europaea</i>                                                                  | European mole                 |                       |                                                                              | aa60-259            | NCBI accession: FJ372525                                                     |             |                                                                               |
| <b><i>Chiroptera</i></b><br><i>Pteropus sp.</i>                                        | flying fox                    |                       |                                                                              | aa14-303            | NCBI accession: FJ372520                                                     |             |                                                                               |
| <i>Pteropus vampyrus</i>                                                               | large flying fox              | aa1-140 and aa284-end | NCBI <i>Pteropus vampyrus</i> trace archive: gnl ti 1399038458 and others    | full length         | NCBI <i>Pteropus vampyrus</i> trace archive: gnl ti 1329134482 and others    | full length | NCBI <i>Pteropus vampyrus</i> trace archive: gnl ti 1384511508 and others     |
| <i>Myotis albescens</i>                                                                | silver-tipped myotis          |                       |                                                                              | aa9-322             | NCBI accession: FJ372498                                                     |             |                                                                               |
| <i>Myotis lucifugus</i> *                                                              | little brown bat              | full length           | NCBI <i>Myotis lucifugus</i> trace archive: gnl ti 1912741925 and others     | full length         | NCBI <i>Myotis lucifugus</i> trace archive: gnl ti 1899487221 and others     | full length | NCBI <i>Myotis lucifugus</i> trace archive: gnl ti 1895512953 and others      |

|                                 |                     |             |                                                                                                |             |                                                                         |                |                                                                                                |
|---------------------------------|---------------------|-------------|------------------------------------------------------------------------------------------------|-------------|-------------------------------------------------------------------------|----------------|------------------------------------------------------------------------------------------------|
| <i>Rhogeessa io</i>             | Thomas's yellow bat |             |                                                                                                | aa14-312    | NCBI accession: FJ372522                                                |                |                                                                                                |
| <b><i>Cetartiodactyla</i></b>   |                     |             |                                                                                                |             |                                                                         |                |                                                                                                |
| <i>Hexaprotodon liberiensis</i> | pygmy hippopotamus  |             |                                                                                                | aa13-315    | NCBI accession: FJ372475                                                |                |                                                                                                |
| <i>Bos taurus</i> *             | cattle              | full length | NCBI accession: FJ372446 and NCBI <i>Bos taurus</i> trace archive: gnl ti 501216465 and others | full length | NCBI <i>Bos taurus</i> trace archive: gnl ti 620739238 and others       | full length    | NCBI accession: FJ372540 and NCBI <i>Bos taurus</i> trace archive: gnl ti 508561082 and others |
| <i>Bison bonasus</i>            | European bison      |             |                                                                                                | aa100-290   | NCBI accession: FJ372453                                                |                |                                                                                                |
| <i>Ovis aries</i>               | sheep               |             |                                                                                                | aa14-304    | NCBI accession: FJ372507                                                |                |                                                                                                |
| <i>Ovibos moschatus</i>         | muskox              |             |                                                                                                | aa71-312    | NCBI accession: FJ372506                                                |                |                                                                                                |
| <i>Hippotragus niger</i>        | sable antelope      |             |                                                                                                | aa42-314    | NCBI accession: FJ372476                                                |                |                                                                                                |
| <i>Cervus elaphus</i>           | red deer            |             |                                                                                                | aa14-304    | NCBI accession: FJ372462                                                |                |                                                                                                |
| <i>Giraffa camelopardalis</i>   | giraffe             |             |                                                                                                | aa67-312    | NCBI accession: FJ372472                                                |                |                                                                                                |
| <i>Sus scrofa</i> *             | boar                | full length | NCBI <i>Sus scrofa</i> trace archive: gnl ti 1420532685 and others                             | full length | NCBI <i>Sus scrofa</i> trace archive: gnl ti 1579919251 and others      | full length    | NCBI <i>Sus scrofa</i> trace archive: gnl ti 1579918704 and others                             |
| <i>Camelus bactrianus</i>       | bactrian camel      |             |                                                                                                | aa75-312    | NCBI accession: FJ372455                                                |                |                                                                                                |
| <i>Vicugna vicugna</i>          | Vicugna             | full length | NCBI <i>Vicugna vicugna</i> trace archive: gnl ti 1983213061 and others                        | full length | NCBI <i>Vicugna vicugna</i> trace archive: gnl ti 1963834526 and others | aa28-end       | NCBI <i>Vicugna vicugna</i> trace archive: gnl ti 1930070997 and others                        |
| <b><i>Perissodactyla</i></b>    |                     |             |                                                                                                |             |                                                                         |                |                                                                                                |
| <i>Equus caballus</i> *         | horse               | full length | NCBI <i>Equus caballus</i> trace archive: gnl ti 1232113054 and others                         | full length | NCBI <i>Equus caballus</i> trace archive: gnl ti 1234728610 and others  | full length 2x | NCBI <i>Equus caballus</i> trace archive: gnl ti 1204042749 and others                         |
| <i>Equus przewalskii</i>        | Przewalski horse    |             |                                                                                                | aa10-335    | NCBI accession: FJ372466, FJ372467                                      |                |                                                                                                |
| <i>Ceratotherium simum</i>      | white rhinoceros    |             |                                                                                                | aa13-306    | NCBI accession: FJ372460                                                |                |                                                                                                |

|                               |                      |           |                                                                    |              |                                                                                                 |             |                                                                    |
|-------------------------------|----------------------|-----------|--------------------------------------------------------------------|--------------|-------------------------------------------------------------------------------------------------|-------------|--------------------------------------------------------------------|
| <i>Tapirus sp.</i>            | tapir                |           |                                                                    | aa13-314     | NCBI accession: FJ372526, FJ372527                                                              |             |                                                                    |
| <b><i>Carnivora</i></b>       |                      |           |                                                                    |              |                                                                                                 |             |                                                                    |
| <i>Feliformia</i>             |                      |           |                                                                    |              |                                                                                                 |             |                                                                    |
| <i>Hyaena hyaena</i>          | striped hyena        |           |                                                                    | aa21-304     | NCBI accession: FJ372479                                                                        |             |                                                                    |
| <i>Felis catus</i>            | cat                  | aa106-end | NCBI <i>Felis catus</i> trace archive: gnl ti 652118115 and others | full length  | NCBI accession: FJ372470 and NCBI <i>Felis catus</i> trace archive: gnl ti 965531899 and others | full length | NCBI <i>Felis catus</i> trace archive: gnl ti 653605578 and others |
| <i>Acinonyx jubatus</i>       | cheetah              |           |                                                                    | aa14-312     | NCBI accession: FJ372449                                                                        |             |                                                                    |
| <i>Panthera leo</i>           | lion                 |           |                                                                    | aa15-316     | NCBI accession: FJ372508                                                                        |             |                                                                    |
| <i>Panthera onca</i>          | jaguar               |           |                                                                    | aa15-314     | NCBI accession: FJ372509                                                                        |             |                                                                    |
| <i>Panthera tigris</i>        | tiger                |           |                                                                    | aa14-312     | NCBI accession: FJ372510                                                                        |             |                                                                    |
| <i>Uncia uncia</i>            | snow leopard         |           |                                                                    | aa21-312     | NCBI accession: FJ372530, FJ372531                                                              |             |                                                                    |
| <i>Carniformia</i>            |                      |           |                                                                    |              |                                                                                                 |             |                                                                    |
| <i>Zalophus californianus</i> | California sea lion  |           |                                                                    | aa13-317 (P) | NCBI accession: FJ372538                                                                        |             |                                                                    |
| <i>Phoca sibirica</i>         | Baikal seal          |           |                                                                    | aa12-307     | NCBI accession: FJ372516                                                                        |             |                                                                    |
| <i>Nasua nasua</i>            | ring-tailed coati    |           |                                                                    | aa12-318     | NCBI accession: FJ372499                                                                        |             |                                                                    |
| <i>Mustelidae</i>             |                      |           |                                                                    |              |                                                                                                 |             |                                                                    |
| <i>Lutra lutra</i>            | Eurasian river otter |           |                                                                    | aa13-314     | NCBI accession: FJ372489, FJ372490                                                              |             |                                                                    |
| <i>Martes foina</i>           | beach marten         |           |                                                                    | aa13-314     | NCBI accession: FJ372494                                                                        |             |                                                                    |
| <i>Ursidae</i>                |                      |           |                                                                    |              |                                                                                                 |             |                                                                    |
| <i>Ailuropoda melanoleuca</i> | giant panda          |           |                                                                    | aa12-315     | NCBI accession: FJ372450                                                                        |             |                                                                    |
| <i>Ursus malayanus</i>        | Malayan sun bear     |           |                                                                    | aa12-312     | NCBI accession: FJ372534                                                                        |             |                                                                    |
| <i>Ursus americanus</i>       | American black bear  |           |                                                                    | aa12-310     | NCBI accession: FJ372532                                                                        |             |                                                                    |
| <i>Ursus arctos</i>           | brown bear           |           |                                                                    | aa12-299     | NCBI accession: FJ372533                                                                        |             |                                                                    |
| <i>Ursus maritimus</i>        | polar bear           |           |                                                                    | aa12-310     | NCBI accession: FJ372535                                                                        |             |                                                                    |

|                                                                                             |                     |                 |                                                                               |                |                                                                                                       |                     |                                                                                                      |
|---------------------------------------------------------------------------------------------|---------------------|-----------------|-------------------------------------------------------------------------------|----------------|-------------------------------------------------------------------------------------------------------|---------------------|------------------------------------------------------------------------------------------------------|
| <i>Canidae</i><br><i>Canis lupus</i><br><i>Canis familiaris</i>                             | gray wolf           |                 |                                                                               | aa13-300       | NCBI accession: FJ372457                                                                              |                     |                                                                                                      |
|                                                                                             | dog                 |                 |                                                                               | full length    | NCBI accession: FJ372456 and NCBI <i>Canis familiaris</i> trace archive: gnl ti 302723376 and others  | full length         | NCBI accession: FJ372543 and NCBI <i>Canis familiaris</i> trace archive: gnl ti 290457734 and others |
| <i>Nyctereutes procyonoides</i>                                                             | raccoon dog         |                 |                                                                               | aa14-312       | NCBI accession: FJ372500                                                                              |                     |                                                                                                      |
| <i>Vulpes vulpes</i>                                                                        | red fox             |                 |                                                                               | aa14-312       | NCBI accession: FJ372537                                                                              |                     |                                                                                                      |
| <b><i>Euarchontoglires</i></b><br><b><i>Scandentia</i></b><br><i>Tupaia belangeri</i>       | northern tree shrew | aa1-216         | NCBI <i>Tupaia belangeri</i> trace archive: gnl ti 1069820554 and others      | full length 2x | NCBI accession: FJ372529 and NCBI <i>Tupaia belangeri</i> trace archive: gnl ti 1046628937 and others | aa204-end           | NCBI <i>Tupaia belangeri</i> trace archive: gnl ti 1072248002 and others                             |
| <b><i>Glires</i></b><br><i>Lagomorpha</i><br><i>Ochotonidae</i><br><i>Ochotona princeps</i> | american Pika       | full length (P) | NCBI <i>Ochotona princeps</i> trace archive: gnl ti 1535960125 and others     | aa177-end      | NCBI <i>Ochotona princeps</i> trace archive: gnl ti 1539847207 and others                             | full length         | NCBI <i>Ochotona princeps</i> trace archive: gnl ti 1528160173 and others                            |
| <i>Leporidae</i><br><i>Oryctolagus cuniculus</i> *                                          | european rabbit     | full length     | NCBI <i>Oryctolagus cuniculus</i> trace archive: gnl ti 1992167154 and others | full length    | NCBI <i>Oryctolagus cuniculus</i> trace archive: gnl ti 638702844 and others                          | full length         | NCBI <i>Oryctolagus cuniculus</i> trace archive: gnl ti 621098157 and others                         |
| <i>Rodentia</i><br><i>Hystricognathi</i><br><i>Cavia porcellus</i> *                        | domestic guinea pig | full length     | NCBI <i>Cavia porcellus</i> trace archive: gnl ti 1653413717 and others       | full length 2x | NCBI <i>Cavia porcellus</i> trace archive: gnl ti 1596694171 and others                               | full length 3x (2P) | NCBI <i>Cavia porcellus</i> trace archive: gnl ti 1633904227 and others                              |
| <i>Octodontomys gliroides</i>                                                               | Mountain Degu       |                 |                                                                               | aa33-307       | NCBI accession: FJ372502                                                                              |                     |                                                                                                      |

|                                                                                                   |                                |             |                                                                                       |             |                                                                            |             |                                                                                       |
|---------------------------------------------------------------------------------------------------|--------------------------------|-------------|---------------------------------------------------------------------------------------|-------------|----------------------------------------------------------------------------|-------------|---------------------------------------------------------------------------------------|
| <i>Sciurognathi</i><br><i>Dipodomys ordii</i>                                                     | Ord's kangaroo rat             | aa41-303    | NCBI <i>Dipodomys ordii</i> trace archive: gnl ti 1569585119 and others               | full length | NCBI <i>Dipodomys ordii</i> trace archive: gnl ti 1586901258 and others    | full length | NCBI <i>Dipodomys ordii</i> trace archive: gnl ti 1558832023 and others               |
| <i>Ondatra zibethicus</i>                                                                         | muskrat                        |             |                                                                                       | aa14-296    | NCBI accession: FJ372503                                                   |             |                                                                                       |
| <i>Meriones meridianus</i>                                                                        | mid-day jird                   |             |                                                                                       | aa12-311    | NCBI accession: FJ372495                                                   |             |                                                                                       |
| <i>Meriones unguiculatus</i>                                                                      | Mongolian gerbil               |             |                                                                                       | aa12-311    | NCBI accession: FJ372496                                                   |             |                                                                                       |
| <i>Mus musculus</i> *                                                                             | house mouse                    | full length | NCBI accession: FJ372434, NM_001008429                                                | full length | NCBI accession: FJ372497, NM_001008499                                     | full length | NCBI accession: FJ372555, NM_001009574                                                |
| <i>Rattus norvegicus</i> *                                                                        | Norway rat                     | full length | NCBI accession: FJ372433, NM_001009532                                                | full length | NCBI accession: FJ372521, NM_175583                                        | full length | NCBI accession: FJ372562, NM_001009650                                                |
| <i>Spermophilus tridecemlineatus</i>                                                              | thirteen-lined ground squirrel | full length | NCBI <i>Spermophilus tridecemlineatus</i> trace archive: gnl ti 1001097323 and others | aa221-end   | NCBI <i>Spermophilus tridecemlineatus</i> trace archive: gnl ti 1020590663 | aa118-end   | NCBI <i>Spermophilus tridecemlineatus</i> trace archive: gnl ti 1001118269 and others |
| <b>Primates</b><br><i>Strepsirrhini</i><br><i>Chiromyiformes</i><br><i>Nycticebus bengalensis</i> | Bengal slow loris              |             |                                                                                       | aa44-312    | NCBI accession: FJ372501                                                   |             |                                                                                       |
| <i>Lemuriformes</i><br><i>Microcebus murinus</i>                                                  | gray mouse lemur               | full length | NCBI <i>Microcebus murinus</i> trace archive: gnl ti 1556207801 and others            | full length | NCBI <i>Microcebus murinus</i> trace archive: gnl ti 1563038889 and others | full length | NCBI <i>Microcebus murinus</i> trace archive: gnl ti 1570525518 and others            |
| <i>Lemur catta</i>                                                                                | ring-tailed lemur              | aa75-330    | NCBI accession: FJ931108                                                              | aa14-315    | NCBI accession: FJ372486, FJ372487                                         | aa8-333     | NCBI accession: FJ372554                                                              |
| <i>Varecia variegata</i>                                                                          | ruffed lemur                   |             |                                                                                       | aa12-299    | NCBI accession: FJ372536                                                   |             |                                                                                       |

|                                                                                   |                            |                 |                                                                            |                 |                                                                            |                 |                                                                            |
|-----------------------------------------------------------------------------------|----------------------------|-----------------|----------------------------------------------------------------------------|-----------------|----------------------------------------------------------------------------|-----------------|----------------------------------------------------------------------------|
| <i>Lorisiformes</i><br><i>Otolemur garnettii</i>                                  | small-eared galago         | full length     | NCBI <i>Otolemur garnettii</i> trace archive: gnl ti 1095202340 and others | aa42-end        | NCBI <i>Otolemur garnettii</i> trace archive: gnl ti 2016312907 and others | aa19-end        | NCBI <i>Otolemur garnettii</i> trace archive: gnl ti 1094613047 and others |
| <i>Galago moholi</i>                                                              | South African galago       |                 |                                                                            | aa158-311       | NCBI accession: FJ372471                                                   |                 |                                                                            |
| <i>Haplorrhini</i><br><i>Tarsiiformes</i><br><i>Tarsius syrichta</i>              | Philippine tarsier         | full length     | NCBI <i>Tarsius syrichta</i> trace archive: gnl ti 1551473575 and others   | full length     | NCBI <i>Tarsius syrichta</i> trace archive: gnl ti 1546582642 and others   | full length (P) | NCBI <i>Tarsius syrichta</i> trace archive: gnl ti 1496118726 and others   |
| <i>Simiiformes</i><br><i>Platyrrhini</i><br><i>Aotidae</i><br><i>Aotus azarai</i> | Azara's Night Monkey       | aa34-326        | NCBI accession: FJ931100                                                   | aa26-312        | NCBI accession: FJ372451                                                   | aa16-321        | NCBI accession: FJ931101                                                   |
| <i>Atelidae</i><br><i>Lagothrix lagotricha</i>                                    | common woolly monkey       | aa21-336 (P)    | NCBI accession: FJ931109                                                   | aa14-316        | NCBI accession: FJ372485                                                   | aa28-320        | NCBI accession: FJ931110                                                   |
| <i>Ateles fusciceps</i>                                                           | brown-headed spider monkey | aa28-327        | NCBI accession: FJ931102                                                   | aa1-314         | NCBI accession: FJ372452                                                   | aa28-320        | NCBI accession: FJ931103                                                   |
| <i>Ateles geoffroyi</i>                                                           | black-handed spider monkey | aa18-340        | NCBI accession: FJ931104                                                   | aa40-314        | NCBI accession: FJ931105                                                   | aa19-end        | NCBI accession: FJ931106                                                   |
| <i>Cebidae</i><br><i>Callithrix jacchus</i>                                       | common marmoset            | full length (P) | NCBI <i>Callithrix jacchus</i> trace archive: gnl ti 1129809010 and others | full length (P) | NCBI <i>Callithrix jacchus</i> trace archive: gnl ti 1133228298 and others | full length     | NCBI <i>Callithrix jacchus</i> trace archive: gnl ti 1143837426 and others |
| <i>Callithrix geoffroyi</i>                                                       | Geoffroy's marmoset        | aa16-340 (P)    | NCBI accession: FJ372447, FJ372448                                         | aa11-320 (P)    | NCBI accession: FJ931107                                                   | aa6-end         | NCBI accession: FJ372541, FJ372542                                         |
| <i>Saguinus imperator</i>                                                         | emperor tamarin            | aa18-342 (P)    | NCBI accession: FJ372426, FJ372427                                         | aa12-313 (1P)   | NCBI accession: FJ931111, FJ931112                                         | aa29-318        | NCBI accession: FJ931113                                                   |
| <i>Cebus apella</i>                                                               | tufted capuchin            |                 |                                                                            | aa26-296        | NCBI accession: FJ372458, FJ372459                                         |                 |                                                                            |

|                                                                                     |                        |              |                                                                                                               |              |                                                                                                               |              |                                                                                                               |
|-------------------------------------------------------------------------------------|------------------------|--------------|---------------------------------------------------------------------------------------------------------------|--------------|---------------------------------------------------------------------------------------------------------------|--------------|---------------------------------------------------------------------------------------------------------------|
| <i>Saimiri sciureus</i>                                                             | common squirrel monkey | aa74-327     | NCBI accession: FJ931114                                                                                      | full length  | NCBI accession: FJ372523, FJ372524 and EF549700                                                               | aa16-329     | NCBI accession: FJ931115                                                                                      |
| <i>Catarrhini</i><br><i>Cercopithecoidea</i><br><i>Erythrocebus</i><br><i>patas</i> | patas monkey           | aa15-340     | NCBI accession: FJ372444, FJ372445                                                                            | aa11-315     | NCBI accession: FJ372469                                                                                      | aa20-end     | NCBI accession: FJ372544                                                                                      |
| <i>Macaca mulatta</i>                                                               | rhesus monkey          | full length  | NCBI accession: FJ372435, FJ372436 and NCBI <i>Macaca mulatta</i> trace archive: gn ti 376527395 and others   | full length  | NCBI accession: FJ372491, FJ372492 and NCBI <i>Macaca mulatta</i> trace archive: gn ti 486761772 and others   | full length  | NCBI <i>Macaca mulatta</i> trace archive: gn ti 349474498 and others                                          |
| <i>Macaca fascicularis</i>                                                          | crab-eating Macaque    | aa88-340     | NCBI accession: FJ372437                                                                                      |              |                                                                                                               |              |                                                                                                               |
| <i>Mandrillus sphinx</i>                                                            | mandrill               |              |                                                                                                               | aa12-312     | NCBI accession: FJ372493                                                                                      |              |                                                                                                               |
| <i>Papio hamadryas</i>                                                              | hamadryas baboon       | full length  | NCBI accession: FJ372430, FJ372431 and NCBI <i>Papio hamadryas</i> trace archive: gn ti 2010511994 and others | full length  | NCBI accession: FJ372515, FJ372539 and NCBI <i>Papio hamadryas</i> trace archive: gn ti 1959076673 and others | full length  | NCBI accession: FJ372558, FJ372559 and NCBI <i>Papio hamadryas</i> trace archive: gn ti 1998875785 and others |
| <i>Cercopithecus aethiops</i>                                                       | African green monkey   |              |                                                                                                               | aa26-221     | NCBI accession: FJ372461                                                                                      |              |                                                                                                               |
| <i>Colobus guereza</i>                                                              | guereza                |              |                                                                                                               | aa10-314     | NCBI accession: FJ372463, FJ372464                                                                            |              |                                                                                                               |
| <i>Hominoidea</i><br><i>Hylobatidae</i><br><i>Hylobates lar</i>                     | white-handed gibbon    | aa16-337 (P) | NCBI accession: FJ372440, FJ372441                                                                            | aa18-314     | NCBI accession: FJ372481                                                                                      | aa14-end (P) | NCBI accession: FJ372549, FJ372550                                                                            |
| <i>Nomascus gabriellae</i>                                                          | red-cheeked Gibbon     |              |                                                                                                               | aa11-322 (P) | NCBI accession: FJ372480                                                                                      | aa16-323 (P) | NCBI accession: FJ372548                                                                                      |



|                                                        |                      |                 |                                                                                                                     |                 |                                                                                                                     |                 |                                                                                                                      |
|--------------------------------------------------------|----------------------|-----------------|---------------------------------------------------------------------------------------------------------------------|-----------------|---------------------------------------------------------------------------------------------------------------------|-----------------|----------------------------------------------------------------------------------------------------------------------|
| <i>Nomascus leucogenys</i>                             | white-cheeked Gibbon |                 |                                                                                                                     | full length (P) | NCBI accession: FJ372482, FJ372483 and NCBI <i>Nomascus leucogenys</i> trace archive: gnl ti 2088070237 and others  | full length (P) | NCBI accession: FJ372551 and NCBI <i>Nomascus leucogenys</i> trace archive: gnl ti 2092296901 and others             |
| <i>Symphalangus syndactylus</i>                        | siamang              | aa16-340 (P)    | NCBI accession: FJ372438, FJ372439                                                                                  | aa12-317        | NCBI accession: FJ372484                                                                                            | aa9-334         | NCBI accession: FJ372552, FJ372553                                                                                   |
| <i>Hominidae</i><br><i>Gorilla gorilla</i>             | Western Gorilla      | aa15-end (P)    | NCBI accession: FJ372442, FJ372443 and NCBI <i>Gorilla gorilla</i> trace archive: gnl ti 1669650693 and others      | full length (P) | NCBI accession: FJ372473, FJ372474 and NCBI <i>Gorilla gorilla</i> trace archive: gnl ti 2033155805 and others      | full length     | NCBI accession: FJ372545, FJ372546 and NCBI <i>Gorilla gorilla</i> trace archive: gnl ti 1688237874 and others       |
| <i>Homo sapiens</i>                                    | human                | full length (P) | NCBI accession: NG_002481                                                                                           | full length (P) | NCBI accession: FJ372477, FJ372478, NG_004855                                                                       | full length     | NCBI accession: FJ372547, NM_003967                                                                                  |
| <i>Pan paniscus</i>                                    | bonobo               |                 |                                                                                                                     | aa29-313 (P)    | NCBI accession: FJ372511, FJ372512                                                                                  |                 |                                                                                                                      |
| <i>Pan troglodytes</i>                                 | chimpanzee           | full length (P) | NCBI accession: FJ372432, NG_004781                                                                                 | full length (P) | NCBI accession: FJ372513, FJ372514, AY702310                                                                        | full length     | NCBI accession: FJ372556, FJ372557, NM_001009126                                                                     |
| <i>Pongo pygmaeus</i>                                  | orangutan            | full length (P) | NCBI accession: FJ372428, FJ372429 and NCBI <i>Pongo pygmaeus abelii</i> trace archive: gnl ti 940938990 and others | full length (P) | NCBI accession: FJ372517, FJ372518 and NCBI <i>Pongo pygmaeus abelii</i> trace archive: gnl ti 886956191 and others | full length     | NCBI accession: FJ372560, FJ372561 and NCBI <i>Pongo pygmaeus abelii</i> trace archive: gnl ti 1000874246 and others |
| <b><i>Sauropsida</i></b><br><i>Anolis carolinensis</i> | green anole          |                 |                                                                                                                     |                 |                                                                                                                     | full length     | NCBI <i>Anolis carolinensis</i> trace archive: gnl ti 1368146017 and others                                          |

|                      |         |  |  |  |  |             |                                                                                     |
|----------------------|---------|--|--|--|--|-------------|-------------------------------------------------------------------------------------|
| <i>Gallus gallus</i> | chicken |  |  |  |  | full length | NCBI <i>Gallus gallus</i> trace archive: <a href="#">gn ti 282469281</a> and others |
|----------------------|---------|--|--|--|--|-------------|-------------------------------------------------------------------------------------|

Abbreviations: aa amino acid, (P) pseudogene, 14 sequences used for mammalian tree (Figure S2 and S7) are depicted with \*
