# Supplementary material for: Structural and Functional Evolution of the Trace Amine-Associated Receptors TAAR3, TAAR4 and TAAR5 in Primates
Source: PubMed Central journal article supplement (PMC2886124; doi:10.1371/journal.pone.0011133), 2010-06-15
Supplement: pone.0011133.s010.pdf [file pone.0011133.s010.pdf]

| <b>species</b>                  |                            | <b>source</b>                                                                                                                                                                          |
|---------------------------------|----------------------------|----------------------------------------------------------------------------------------------------------------------------------------------------------------------------------------|
| <i>Acinonyx jubatus</i>         | cheetah                    | Dr C. Pitra, IZW, Berlin, Germany                                                                                                                                                      |
| <i>Ailuropoda melanoleuca</i>   | giant panda                | Dr C. Pitra, IZW, Berlin, Germany                                                                                                                                                      |
| <i>Aotus azarai</i>             | Azara's Night Monkey       | Dr W. Enard, MPI, Leipzig, Germany                                                                                                                                                     |
| <i>Ateles fusciceps</i>         | brown-headed spider monkey | Dr W. Enard, MPI, Leipzig, Germany                                                                                                                                                     |
| <i>Ateles geoffroyi</i>         | black-handed spider monkey | Dr W. Enard, MPI, Leipzig, Germany                                                                                                                                                     |
| <i>Bison bonasus</i>            | European bison             | Dr C. Pitra, IZW, Berlin, Germany                                                                                                                                                      |
| <i>Bos taurus</i>               | cattle                     | Dr J. Chae, University of Chonbuk, Korea                                                                                                                                               |
| <i>Bradypus tridactylus</i>     | pale-throated sloth        | Dr M. Hofreiter, MPI, Leipzig, Germany                                                                                                                                                 |
| <i>Callithrix geoffroyi</i>     | Geoffroy's marmoset        | Dr J. Rhyne, University of Maryland, Baltimore, USA                                                                                                                                    |
| <i>Callithrix jacchus</i>       | common marmoset            | Dr T. Haaf, MPI Molecular Genetics Berlin, Germany; Dr W. Enard, MPI, Leipzig, Germany                                                                                                 |
| <i>Camelus bactrianus</i>       | bactrian camel             | Dr C. Pitra, IZW, Berlin, Germany                                                                                                                                                      |
| <i>Canis familiaris</i>         | dog                        | own source                                                                                                                                                                             |
| <i>Canis lupus</i>              | gray wolf                  | Dr C. Pitra, IZW, Berlin, Germany                                                                                                                                                      |
| <i>Cebus apella</i>             | tufted capuchin            | Dr W. Enard, MPI, Leipzig, Germany                                                                                                                                                     |
| <i>Ceratotherium simum</i>      | white rhinoceros           | Dr C. Pitra, IZW, Berlin, Germany                                                                                                                                                      |
| <i>Cercopithecus aethiops</i>   | African green monkey       | ATCC – cell collection                                                                                                                                                                 |
| <i>Cervus elaphus</i>           | red deer                   | Dipl. Med. J. Moeller, Erfurt, Germany                                                                                                                                                 |
| <i>Colobus guereza</i>          | guereza                    | Dr W. Enard, MPI, Leipzig, Germany                                                                                                                                                     |
| <i>Dipodomys ordii</i>          | Ord's kangaroo rat         |                                                                                                                                                                                        |
| <i>Elephas maximus</i>          | asiatic elephant           | Dr C. Pitra, IZW, Berlin, Germany                                                                                                                                                      |
| <i>Equus przewalskii</i>        | Przewalski horse           | Dr C. Pitra, IZW, Berlin, Germany                                                                                                                                                      |
| <i>Erinaceus concolor</i>       | eastern European hedgehog  | own source                                                                                                                                                                             |
| <i>Erythrocebus patas</i>       | patas monkey               | Dr J. Rhyne, University of Maryland, Baltimore, USA                                                                                                                                    |
| <i>Galago moholi</i>            | South African galago       | Dr W. Enard, MPI, Leipzig, Germany                                                                                                                                                     |
| <i>Giraffa camelopardalis</i>   | giraffe                    | Dr C. Pitra, IZW, Berlin, Germany                                                                                                                                                      |
| <i>Gorilla gorilla</i>          | Western Gorilla            | Dr J. Bullerdiek, University of Bremen; Dr T. Haaf, MPI Molecular Genetics Berlin, Germany; Dr J. Rhyne, University of Maryland, Baltimore, USA; Dr L. Vigilant, MPI, Leipzig, Germany |
| <i>Hexaprotodon liberiensis</i> | pygmy hippopotamus         | Dr C. Pitra, IZW, Berlin, Germany                                                                                                                                                      |
| <i>Hippotragus niger</i>        | sable antelope             | Dr C. Pitra, IZW, Berlin, Germany                                                                                                                                                      |
| <i>Homo sapiens</i>             | human                      | Dr M. Stoneking, MPI, Leipzig, Germany; D. Sere, MPI, Leipzig, Germany; own source                                                                                                     |
| <i>Hyaena hyaena</i>            | striped hyena              | Dr C. Pitra, IZW, Berlin, Germany                                                                                                                                                      |
| <i>Hylobates lar</i>            | white-handed gibbon        | Dipl. Biol. C. Roos, Primate Center Goettingen, Germany; Dr W. Enard, MPI, Leipzig, Germany; Dr J. Bullerdiek, University of Bremen; Dr M. Rocchi, University of Bari, Italy           |
| <i>Lagothrix lagotricha</i>     | common woolly monkey       | Dr W. Enard, MPI, Leipzig, Germany                                                                                                                                                     |
| <i>Lemur catta</i>              | ring-tailed lemur          | Dr J. Rhyne, University of Maryland, Baltimore, USA; Dr W. Enard, MPI, Leipzig, Germany                                                                                                |
| <i>Loxodonta africana</i>       | African savanna elephant   | Dr C. Pitra, IZW, Berlin, Germany                                                                                                                                                      |
| <i>Lutra lutra</i>              | Eurasian river otter       | Dr C. Pitra, IZW, Berlin, Germany                                                                                                                                                      |
| <i>Macaca fascicularis</i>      | crab-eating Macaque        | Dr W. Enard, MPI, Leipzig, Germany                                                                                                                                                     |

|                                 |                        |                                                                                                                                  |
|---------------------------------|------------------------|----------------------------------------------------------------------------------------------------------------------------------|
|                                 |                        | Dr J. Rhyne, University of Maryland, Baltimore, USA; Dr M. Rocchi, University of Bari, Italy; Dr W. Enard, MPI, Leipzig, Germany |
| <i>Macaca mulatta</i>           | rhesus monkey          |                                                                                                                                  |
| <i>Mandrillus sphinx</i>        | mandrill               | Dr W. Enard, MPI, Leipzig, Germany                                                                                               |
| <i>Martes foina</i>             | beach marten           | own source                                                                                                                       |
| <i>Meriones meridianus</i>      | mid-day jird           | Dr C. Pitra, IZW, Berlin, Germany                                                                                                |
| <i>Meriones unguiculatus</i>    | Mongolian gerbil       | Research Facility for Experimental Medicine, Berlin, Germany                                                                     |
| <i>Mus musculus</i>             | house mouse            | Dr A. Orth, University of Montpellier, France                                                                                    |
| <i>Myotis albescens</i>         | silver-tipped myotis   | Dr C. Pitra, IZW, Berlin, Germany                                                                                                |
| <i>Nasua nasua</i>              | ring-tailed coati      | Dr C. Pitra, IZW, Berlin, Germany                                                                                                |
| <i>Nomascus gabriellae</i>      | red-cheeked Gibbon     | Dipl. Biol. C. Roos, Primate Center Goettingen, Germany                                                                          |
| <i>Nomascus leucogenys</i>      | white-cheeked Gibbon   | Dipl. Biol. C. Roos, Primate Center Goettingen, Germany                                                                          |
| <i>Nyctereutes procyonoides</i> | raccoon dog            | Dr C. Pitra, IZW, Berlin, Germany                                                                                                |
| <i>Nycticebus bengalensis</i>   | Bengal slow loris      | Dr W. Enard, MPI, Leipzig, Germany                                                                                               |
| <i>Octodontomys gliroides</i>   | Mountain Degu          | Dr R. Adkins, University of TN, USA                                                                                              |
|                                 |                        | Dr Lauenstein, Federal Centre for Agriculture and Forestry, Braunschweig, Germany                                                |
| <i>Ondatra zibethicus</i>       | muskrat                |                                                                                                                                  |
| <i>Orycteropus afer</i>         | aardvark               | Dr R. Adkins, University of TN, USA                                                                                              |
| <i>Ovibos moschatus</i>         | muskox                 | Dr C. Pitra, IZW, Berlin, Germany                                                                                                |
| <i>Ovis aries</i>               | sheep                  | Dr C. Pitra, IZW, Berlin, Germany                                                                                                |
|                                 |                        | Dr W. Enard, MPI, Leipzig, Germany; Dr L. Vigilant, MPI, Leipzig, Germany                                                        |
| <i>Pan paniscus</i>             | bonobo                 |                                                                                                                                  |
|                                 |                        | Dr T. Haaf, MPI Molecular Genetics Berlin, Germany; Dr W. Enard, MPI, Leipzig, Germany; Dr M. Rocchi, University of Bari, Italy  |
| <i>Pan troglodytes</i>          | chimpanzee             |                                                                                                                                  |
| <i>Panthera leo</i>             | lion                   | Dr C. Pitra, IZW, Berlin, Germany                                                                                                |
| <i>Panthera onca</i>            | jaguar                 | Dr C. Pitra, IZW, Berlin, Germany                                                                                                |
| <i>Panthera tigris</i>          | tiger                  | Dr C. Pitra, IZW, Berlin, Germany                                                                                                |
|                                 |                        | Dr M. Rocchi, University of Bari, Italy; Dr W. Enard, MPI, Leipzig, Germany                                                      |
| <i>Papio hamadryas</i>          | hamadryas baboon       |                                                                                                                                  |
| <i>Phoca sibirica</i>           | Baikal seal            | Dr C. Pitra, IZW, Berlin, Germany                                                                                                |
|                                 |                        | Dr J. Rhyne, University of Maryland, Baltimore, USA; Dr M. Rocchi, University of Bari, Italy; Dr W. Enard, MPI, Leipzig, Germany |
| <i>Pongo pygmaeus</i>           | Orangutan              |                                                                                                                                  |
| <i>Pteropus sp.</i>             | flying fox             | Dr C. Pitra, IZW, Berlin, Germany                                                                                                |
|                                 |                        | Research Facility for Experimental Medicine, Berlin, Germany                                                                     |
| <i>Rattus norvegicus</i>        | Norway rat             |                                                                                                                                  |
| <i>Rhogeessa io</i>             | Thomas's yellow bat    | Dr C. Pitra, IZW, Berlin, Germany                                                                                                |
|                                 |                        | Dr J. Rhyne, University of Maryland, Baltimore, USA                                                                              |
| <i>Saguinus imperator</i>       | emperor tamarin        |                                                                                                                                  |
| <i>Saimiri sciureus</i>         | common squirrel monkey | Dr W. Enard, MPI, Leipzig, Germany                                                                                               |
|                                 |                        | Dipl. Biol. C. Roos, Primate Center Goettingen, Germany; Dr T. Haaf, MPI Molecular Genetics Berlin, Germany                      |
| <i>Symphalangus syndactylus</i> | siamang                |                                                                                                                                  |
| <i>Talpa europaea</i>           | European mole          | own source                                                                                                                       |
| <i>Tapirus sp.</i>              | tapir                  | Dr C. Pitra, IZW, Berlin, Germany                                                                                                |
| <i>Trichechus manatus</i>       | Caribbean manatee      | Dr C. Pitra, IZW, Berlin, Germany                                                                                                |
| <i>Uncia uncia</i>              | snow leopard           | Dr C. Pitra, IZW, Berlin, Germany                                                                                                |
| <i>Ursus americanus</i>         | American black bear    | Dr C. Pitra, IZW, Berlin, Germany                                                                                                |

|                               |                     |                                    |
|-------------------------------|---------------------|------------------------------------|
| <i>Ursus arctos</i>           | brown bear          | Dr C. Pitra, IZW, Berlin, Germany  |
| <i>Ursus malayanus</i>        | Malayan sun bear    | Dr C. Pitra, IZW, Berlin, Germany  |
| <i>Ursus maritimus</i>        | polar bear          | Dr C. Pitra, IZW, Berlin, Germany  |
| <i>Varecia variegata</i>      | ruffed lemur        | Dr W. Enard, MPI, Leipzig, Germany |
| <i>Vulpes vulpes</i>          | red fox             | Dr C. Pitra, IZW, Berlin, Germany  |
| <i>Zalophus californianus</i> | California sea lion | Dr C. Pitra, IZW, Berlin, Germany  |
