# Supplementary material for: Structural and Functional Evolution of the Trace Amine-Associated Receptors TAAR3, TAAR4 and TAAR5 in Primates
Source: PubMed Central journal article supplement (PMC2886124; doi:10.1371/journal.pone.0011133), 2010-06-15
Supplement: pone.0011133.s011.pdf [file pone.0011133.s011.pdf]

| <b>ID</b> | <b>sequence 5' -&gt; 3'</b>                                                 | <b>purpose</b>                |
|-----------|-----------------------------------------------------------------------------|-------------------------------|
| OLIGO.123 | ATGTGCTTCAGGAAAAAGATTTGC                                                    | mouse TAAR3 amplification     |
| OLIGO.124 | GATCTAATATACATTCCCGAAGACTTATCC                                              | mouse TAAR3 amplification     |
| OLIGO.153 | CCCGACTACGCCGATCTAATATACATTCCCGAAGA                                         | mouse TAAR3 HA-adaptor        |
| OLIGO.154 | CATCGTCCTTATAGTCATGTGCTTCAGGAAAAAGA                                         | mouse TAAR3 FLAG-adaptor      |
| OLIGO.188 | CCTGGGTTTGTAAAGGGTCAA                                                       | rat TAAR3 amplification       |
| OLIGO.191 | TGTACTCCAGGCAGGTGAAGT                                                       | rat TAAR3 amplification       |
| OLIGO.190 | CCCGACTACGCCGATCTAATATACATTCTCTG                                            | rat TAAR3 HA-adaptor          |
| OLIGO.189 | CATCGTCCTTATAGTCATGTGCTTCAGGAAAAAG                                          | rat TAAR3 FLAG-adaptor        |
| OLIGO.178 | AGTGACCTGGGGATGTAACG                                                        | cow TAAR3 amplification       |
| OLIGO.181 | GCTGAAATTTCTGGGATCA                                                         | cow TAAR3 amplification       |
| OLIGO.180 | CCCGACTACGCCGATCTAACTTATATTCCTGAAG                                          | cow TAAR3 HA-adaptor          |
| OLIGO.179 | CATCGTCCTTATAGTCATGTGCTTCAGGAAACAG                                          | cow TAAR3 FLAG-adaptor        |
| OLIGO.121 | ATGTGCTTCAGGAAACAAATTTGCAG                                                  | primate TAAR3 amplification   |
| OLIGO.122 | GATCTAAYTTAYATTCCCGAMGACCTATC                                               | primate TAAR3 amplification   |
| OLIGO.150 | CCCGACTACGCCGATCTAAYTTAYATTCCCGAMGA                                         | primate TAAR3 HA-adaptor      |
| OLIGO.152 | CATCGTCCTTATAGTCATGTGCTTCAGGAAACAAA                                         | primate TAAR3 FLAG-adaptor    |
| OLIGO.163 | CCTCTCCATGGCAACCA                                                           | TAAR3 sequencing              |
| OLIGO.164 | CCTGGCTCCATCATGGTT                                                          | TAAR3 sequencing              |
| OLIGO.165 | GGTACTTCAACTCTACTTGCAACCC                                                   | TAAR3 sequencing              |
| OLIGO.174 | TGGTTGCCATGGAGAGG                                                           | TAAR3 sequencing              |
| OLIGO.175 | AACCATGATGGAGCCAGG                                                          | TAAR3 sequencing              |
| OLIGO.a   | GCCGACTTAGGAATGCAATGTCA                                                     | mouse TAAR4 amplification     |
| OLIGO.b   | GACCCATCCCTCTTTCCCTTTCT                                                     | mouse TAAR4 amplification     |
| OLIGO.55  | AATACACCCGACCCCTGGA                                                         | mouse TAAR4 re-amplification  |
| OLIGO.158 | CCCGACTACGCCAATACACCCGACCCCTGGA                                             | mouse TAAR4 HA-adaptor        |
| OLIGO.171 | CCCAAACCTTCTACGTGCCTTTCTCCAACAAGACGG<br>GCGTGTTGCGCAATACACCCGACCCCTGGA      | mouse TAAR4 rhodopsin-adaptor |
| OLIGO.c   | TTTGGGGAAAACAAGTTCCTGGT                                                     | rat TAAR4 amplification       |
| OLIGO.d   | TCTGTGAGGTTCAGCACTCATGC                                                     | rat TAAR4 amplification       |
| OLIGO.56  | AATTCACCTGACCTCTGGTACTCC                                                    | rat TAAR4 re-amplification    |
| OLIGO.159 | CCCGACTACGCCAATTCACCTGACCTCTGGTACTC<br>CCCAAACCTTCTACGTGCCTTTCTCCAACAAGACGG | rat TAAR4 HA-adaptor          |
| OLIGO.115 | GCGTGTTGCGCAATTCACCTGACCTCTGGTACTCC                                         | rat TAAR4 rhodopsin-HA-tag    |
| OLIGO.g   | CATCGTCCTTATAGTCAGGATGTGCAGGATGC                                            | rat TAAR4 FLAG-adaptor        |
| OLIGO.e   | TGCAGACTCTCAACCTCCATTCC                                                     | dog TAAR4 amplification       |
| OLIGO.f   | AGGCCATGCGACAGAGTTTCTTT                                                     | dog TAAR4 amplification       |
| OLIGO.54  | AATTCACCTGACATTTACAACCCT                                                    | dog TAAR4 re-amplification    |
| OLIGO.157 | CCCGACTACGCCAATTCACCTGACATTTACAACC<br>CCCAAACCTTCTACGTGCCTTTCTCCAACAAGACGG  | dog TAAR4 HA-adaptor          |
| OLIGO.170 | GCGTGTTGCGCAATTCACCTGACATTTACAACCCT                                         | dog TAAR4 rhodopsin-adaptor   |
| OLIGO.36  | TCATGATYRGDKCNATAGTRATG                                                     | mammal TAAR4 amplification    |
| OLIGO.41  | ATCATCYTMARKGCYTTDCGAAACCARGGATA                                            | mammal TAAR4 amplification    |
| OLIGO.48  | TMATAGTAYCCAYRRGACAAAGAYGATG                                                | mammal TAAR4 amplification    |
| OLIGO.49  | RGGTRGADGAGTCWGRGHGRAAGA                                                    | mammal TAAR4 amplification    |

|           |                                                                           |                                                           |
|-----------|---------------------------------------------------------------------------|-----------------------------------------------------------|
| OLIGO.58  | AATTCACCTGACCTTTGGAATC                                                    | northern treeshrew TAAR4 re-amplification                 |
| OLIGO.161 | CCCGACTACGCCAATTCACCTGACCTTTGGAATC                                        | northern treeshrew TAAR4 HA-adaptor                       |
| OLIGO.173 | CCCAAACCTTCTACGTGCCTTTCTCCAACAAGACGG<br>GCGTGGTGCGCAATTCACCTGACCTTTGGAATC | northern treeshrew TAAR4 rhodopsin-adaptor                |
| OLIGO.53  | AATTTTCCTGACCCTCGGAAT                                                     | spider monkey TAAR4 re-amplification                      |
| OLIGO.156 | CCCGACTACGCCAATTTTCCTGACCCTCGGAAT                                         | spider monkey TAAR4 HA-adaptor                            |
| OLIGO.169 | CCCAAACCTTCTACGTGCCTTTCTCCAACAAGACGG<br>GCGTGGTGCGCAATTTTCCTGACCCTCGGAAT  | spider monkey TAAR4 rhodopsin-adaptor                     |
| OLIGO.57  | AATTTGCCTGACCCTCAGAAC                                                     | rhesus monkey, orangutan, siamang TAAR4 re-amplification  |
| OLIGO.160 | CCCGACTACGCCAATTTGCCTGACCCTCAGAAC                                         | rhesus monkey, orangutan, siamang TAAR4 HA-adaptor        |
| OLIGO.172 | CCCAAACCTTCTACGTGCCTTTCTCCAACAAGACGG<br>GCGTGGTGCGCAATTTGCCTGACCCTCAGAAC  | rhesus monkey, orangutan, siamang TAAR4 rhodopsin-adaptor |
| OLIGO.51  | AGCAAGGGCAGGAAACAGGCTTARGGTRGADGAG<br>TCWGRGHGRAAGA                       | reamplification construct TAAR4 C-terminus rhesus monkey  |
| OLIGO.162 | CATCGTCCTTATAGTCAGCAAGGGCAGGAAACAG<br>GCTTA                               | rhesus monkey TAAR4 C-terminus and FLAG adaptor           |
| OLIGO.59  | GATCGGGGCTATAGTGATGAC                                                     | TAAR4 sequencing                                          |
| OLIGO.60  | GCTGTGTGGTCATGCCYTTCA                                                     | TAAR4 sequencing                                          |
| OLIGO.61  | TGGCTACTGTAAAAATRTGTA                                                     | TAAR4 sequencing                                          |
| OLIGO.127 | GTCATGGTATAAATCAACAGTCGGTGTCC                                             | mouse TAAR5 amplification                                 |
| OLIGO.128 | AGAGCTGTCTCCTCCCGGGCTCT                                                   | mouse TAAR5 amplification                                 |
| OLIGO.151 | CCCGACTACGCCAGAGCTGTCTCCTCCCGGGCTC                                        | mouse TAAR5 HA-adaptor                                    |
| OLIGO.155 | CATCGTCCTTATAGTCGTCATGGTATAAATCAACA                                       | mouse TAAR5 FLAG-adaptor                                  |
| OLIGO.192 | CACCGTCTTCCTTCCTGCTA                                                      | rat TAAR5 amplification                                   |
| OLIGO.195 | AAAGGTGACCAGTTCCAGA                                                       | rat TAAR5 amplification                                   |
| OLIGO.194 | CCCGACTACGCCAGAGCTGTCTCCTCCCC                                             | rat TAAR5 HA-adaptor                                      |
| OLIGO.193 | CATCGTCCTTATAGTCGTCATGGAACAGATCAGCA                                       | rat TAAR5 FLAG-adaptor                                    |
| OLIGO.182 | CAATGGACATGAGTTTGAGCA                                                     | cow TAAR5 amplification                                   |
| OLIGO.185 | CAAATCTTCCTTTGGTTCTTCC                                                    | cow TAAR5 amplification                                   |
| OLIGO.184 | CCCGACTACGCCAGTGTGGTCCTCAACCA                                             | cow TAAR5 HA-adaptor                                      |
| OLIGO.183 | CATCGTCCTTATAGTCATCTTGGTACAAATCAATT                                       | cow TAAR5 FLAG-adaptor                                    |
| OLIGO.196 | ACCTACCCCTTTCCTGCATT                                                      | dog TAAR5 amplification                                   |
| OLIGO.197 | GGTGGTCAGTCCCAGAGAG                                                       | dog TAAR5 amplification                                   |
| OLIGO.187 | CCCGACTACGCCGACACTGTCTCAGCCAAG                                            | dog TAAR5 HA-adaptor                                      |
| OLIGO.186 | CATCGTCCTTATAGTCTTCTTGGTACAAATCAATA                                       | dog TAAR5 FLAG-adaptor                                    |
| OLIGO.125 | TTCTTGGTACAAATCAACAGTGC                                                   | primate TAAR5 amplification                               |
| OLIGO.126 | AGAGCTGTCTTYATCCAAGGTG                                                    | primate TAAR5 amplification                               |
| OLIGO.148 | CCCGACTACGCCAGAGCTGTCTTYATCCAAGGTG                                        | primate TAAR5 HA-adaptor                                  |
| OLIGO.149 | CATCGTCCTTATAGTCTTCTTGGTACAAATCAACA                                       | primate TAAR5 FLAG-adaptor                                |
| OLIGO.166 | GTGGAGAGCTGCTGGTTCTT                                                      | TAAR5 sequencing                                          |
| OLIGO.167 | ATGCCTTGTGTGGGCAG                                                         | TAAR5 sequencing                                          |
| OLIGO.168 | GTCTTTGACATCTTATCTGGTTTGC                                                 | TAAR5 sequencing                                          |

|           |                                      |                    |
|-----------|--------------------------------------|--------------------|
| OLIGO.176 | AAGAACCAGCAGCTCTCCAC                 | TAAR5 sequencing   |
| OLIGO.177 | GCAAACCAGATAAAGATGTCAAAGAC           | TAAR5 sequencing   |
| OLIGO.0   | CGCGAATTCCCCACCATGTACCCCTACGACGTCCC  | HA uni EcoRI+Coseq |
|           | CTCGAATTCCCCACCATGTACCCCTACGACGTCCC  |                    |
| OLIGO.113 | CGACTACGCCAACGGGACCGAGGGCCAAACTTC    | HA-Rhod-S-uni      |
|           | TACGTGCCTTTC                         |                    |
| OLIGO.1   | CGCCGCACTAGTTCAC TTATCGTCATCGTCCTTAT | FLAG uni SpeI      |
