# Supplementary material for: Structural and Functional Evolution of the Trace Amine-Associated Receptors TAAR3, TAAR4 and TAAR5 in Primates
Source: PubMed Central journal article supplement (PMC2886124; doi:10.1371/journal.pone.0011133), 2010-06-15
Supplement: pone.0011133.s013.pdf [file pone.0011133.s013.pdf]

| receptor  | conservation<br>between orthologs<br>(% aa identity) |
|-----------|------------------------------------------------------|
| Rhodopsin | 94.2±1.3                                             |
| ADRB1     | 92.2±2.8                                             |
| ADRB2     | 87.3±2.8                                             |
| MC4R      | 94.0±2.0                                             |
| V2R       | 85.4±3.1                                             |
| TAAR1     | 78.9±5.9                                             |
| TAAR2     | 88.9±2.3                                             |
| TAAR3     | 87.2±2.7                                             |
| TAAR4     | 83.5±3.2                                             |
| TAAR5     | 85.6±2.6                                             |
| TAAR6     | 84.1±3.3                                             |
