# Supplementary material for: Structural and Functional Evolution of the Trace Amine-Associated Receptors TAAR3, TAAR4 and TAAR5 in Primates
Source: PubMed Central journal article supplement (PMC2886124; doi:10.1371/journal.pone.0011133), 2010-06-15
Supplement: pone.0011133.s014.pdf [file pone.0011133.s014.pdf]

| <b>models</b>                                                   | <b><i>p</i></b> | <b><i>ℓ</i></b> | <b><i>κ</i></b> | <b>estimates of parameters</b>                                                                    |
|-----------------------------------------------------------------|-----------------|-----------------|-----------------|---------------------------------------------------------------------------------------------------|
| <b>TAAR3</b>                                                    |                 |                 |                 |                                                                                                   |
| <i>primate ORF and pseudogene lineages</i>                      |                 |                 |                 |                                                                                                   |
| <i>Branch-specific models:</i>                                  |                 |                 |                 |                                                                                                   |
| A: Free ratio                                                   | 85              | -2584.43        | 4.23            |                                                                                                   |
| B: One ratio: $\omega_0$                                        | 44              | -2639.40        | 4.14            | $\omega_0 = 0.218$                                                                                |
| C: Two ratios: $\omega_0, \omega_\psi$                          | 45              | -2614.84        | 4.18            | $\omega_0 = 0.128, \omega_\psi = 0.878$                                                           |
| D: Two ratios: $\omega_0, \omega_\psi = 1$                      | 44              | -2614.98        | 4.21            | $\omega_0 = 0.128, \omega_\psi = 1$                                                               |
| E: Two ratios: $\omega_0 = 1, \omega_\psi$                      | 44              | -2721.52        | 5.69            | $\omega_0 = 1, \omega_\psi = 0.920$                                                               |
| F: Three ratios: $\omega_0, \omega_{\psi1}, \omega_{\psi2}$     | 46              | -2612.82        | 4.18            | $\omega_0 = 0.128, \omega_{\psi1} = 2.915, \omega_{\psi2} = 0.701$                                |
| G: Three ratios: $\omega_0, \omega_{\psi1} = 1, \omega_{\psi2}$ | 45              | -2614.10        | 4.14            | $\omega_0 = 0.128, \omega_{\psi1} = 1, \omega_{\psi2} = 0.699$                                    |
| H: Three ratios: $\omega_0, \omega_{\psi1}, \omega_{\psi2} = 1$ | 45              | -2613.69        | 4.24            | $\omega_0 = 0.129, \omega_{\psi1} = 2.924, \omega_{\psi2} = 1$                                    |
| <i>primate ORF lineages</i>                                     |                 |                 |                 |                                                                                                   |
| <i>Branch-specific models:</i>                                  |                 |                 |                 |                                                                                                   |
| Free ratio                                                      | 49              | -2036.22        | 4.39            |                                                                                                   |
| One ratio: $\omega_0$                                           | 26              | -2054.05        | 4.35            | $\omega_0 = 0.122$                                                                                |
| <i>Site-specific models:</i>                                    |                 |                 |                 |                                                                                                   |
| M1a (neutral)                                                   | 27              | -2047.31        | 4.46            | $p_0 = 0.901, p_1 = 0.099$<br>$\omega_0 = 0.061, \omega_1 = 1$                                    |
| M2a (selection)                                                 | 29              | -2047.31        | 4.47            | $p_0 = 0.901, p_1 = 0.079, p_2 = 0.021$<br>$\omega_0 = 0.061, \omega_1 = 1, \omega_2 = 1$         |
| M3 (discrete)                                                   | 30              | -2044.48        | 4.29            | $p_0 = 0.398, p_1 = 0.269, p_2 = 0.333$<br>$\omega_0 = 0.000, \omega_1 = 0.000, \omega_2 = 0.397$ |
| M7 (beta)                                                       | 27              | -2045.03        | 4.33            | $p = 0.211, q = 1.327$                                                                            |
| M8 (beta& $\omega$ )                                            | 29              | -2045.03        | 4.33            | $p_0 = 0.999, p = 0.211, q = 1.327,$<br>$(p_1 = 0.00001), \omega = 1.000$                         |
| <b>14 non-primate mammals</b>                                   |                 |                 |                 |                                                                                                   |
| <i>Branch-specific models:</i>                                  |                 |                 |                 |                                                                                                   |
| Free ratio                                                      | 53              | -5943.61        | 2.93            |                                                                                                   |
| One ratio: $\omega_0$                                           | 28              | -5974.48        | 2.87            | $\omega_0 = 0.106$                                                                                |
| <i>Site-specific models</i>                                     |                 |                 |                 |                                                                                                   |
| M1a (neutral)                                                   | 29              | -5884.20        | 3.08            | $p_0 = 0.881, p_1 = 0.119$<br>$\omega_0 = 0.058, \omega_1 = 1$                                    |
| M2a (selection)                                                 | 31              | -5884.20        | 3.08            | $p_0 = 0.881, p_1 = 0.116, p_2 = 0.004$<br>$\omega_0 = 0.058, \omega_1 = 1, \omega_2 = 1$         |
| M3 (discrete)                                                   | 32              | -5851.43        | 2.91            | $p_0 = 0.532, p_1 = 0.323, p_2 = 0.145$<br>$\omega_0 = 0.007, \omega_1 = 0.125, \omega_2 = 0.541$ |
| M7 (beta)                                                       | 29              | -5851.94        | 2.90            | $p = 0.260, q = 1.795$                                                                            |
| M8 (beta& $\omega$ )                                            | 31              | -5851.94        | 2.90            | $p_0 = 1, p = 0.260, q = 1.795$<br>$(p_1 = 0), \omega = 7.132$                                    |
| <b>TAAR4</b>                                                    |                 |                 |                 |                                                                                                   |
| <i>primate ORF and pseudogene lineages</i>                      |                 |                 |                 |                                                                                                   |
| <i>Branch-specific models:</i>                                  |                 |                 |                 |                                                                                                   |
| A: Free ratio                                                   | 113             | -3196.81        | 3.91            |                                                                                                   |
| B: One ratio: $\omega_0$                                        | 58              | -3248.05        | 3.86            | $\omega_0 = 0.338$                                                                                |
| C: Two ratios: $\omega_0, \omega_\psi$                          | 59              | -3238.77        | 3.88            | $\omega_0 = 0.274, \omega_\psi = 0.884$                                                           |
| D: Two ratios: $\omega_0, \omega_\psi = 1$                      | 58              | -3238.88        | 3.89            | $\omega_0 = 0.274, \omega_\psi = 1$                                                               |
| E: Two ratios: $\omega_0 = 1, \omega_\psi$                      | 58              | -3300.21        | 4.64            | $\omega_0 = 1, \omega_\psi = 0.903$                                                               |
| F: Three ratios: $\omega_0, \omega_{\psi1}, \omega_{\psi2}$     | 60              | -3238.68        | 3.88            | $\omega_0 = 0.274, \omega_{\psi1} = 0.787, \omega_{\psi2} = 0.982$                                |

G: Three ratios:  $\omega_0, \omega_{\psi1} = 1, \omega_{\psi2}$  59 -3238.88 3.89  $\omega_0 = 0.274, \omega_{\psi1} = 1, \omega_{\psi2} = 0.982$   
H: Three ratios:  $\omega_0, \omega_{\psi1}, \omega_{\psi2} = 1$  59 -3238.68 3.88  $\omega_0 = 0.274, \omega_{\psi1} = 0.787, \omega_{\psi2} = 1$

**primate ORF lineages**

*Branch-specific models:*

Free ratio 73 -2679.78 4.02  
One ratio:  $\omega_0$  38 -2706.23 3.98  $\omega_0 = 0.272$   
Two ratios:  $\omega_0, \omega_{cerc}$  39 -2699.06 3.99  $\omega_0 = 0.247, \omega_{cerc} = 2.590$   
Two ratios:  $\omega_0, \omega_{cerc} = 1$  38 -2700.03 3.97  $\omega_0 = 0.246, \omega_{cerc} = 1$

*Site-specific models:*

M1a (neutral) 39 -2693.26 3.98  $p_0 = 0.825, p_1 = 0.175$   
 $\omega_0 = 0.148, \omega_1 = 1$   
M2a (selection) 41 -2693.26 3.98  $p_0 = 0.825, p_1 = 0.110, p_2 = 0.066$   
 $\omega_0 = 0.148, \omega_1 = 1, \omega_2 = 1$   
M3 (discrete) 42 -2692.47 3.98  $p_0 = 0.290, p_1 = 0.650, p_2 = 0.059$   
 $\omega_0 = 0.000, \omega_1 = 0.312, \omega_2 = 1.616$   
M7 (beta) 39 -2693.63 4.00  $p = 0.471, q = 1.159$   
M8 (beta&  $\omega$ ) 41 -2692.65 3.98  $p_0 = 0.953, p = 0.879, q = 2.884$   
 $(p_1 = 0.047), \omega = 1.671$

*Branch-site models:*

Model A (foreground branch: cerc) 41 -2688.97 4.01  $p_0 = 0.388, \omega_{0(\text{othprim})} = 0.153,$   
 $\omega_{0(\text{cerc})} = 0.153$   
 $p_1 = 0.061, \omega_{1(\text{othprim})} = 1, \omega_{1(\text{cerc})} = 1$   
 $p_{2a} = 0.476, \omega_{2a(\text{othprim})} = 0.153,$   
 $\omega_{2a(\text{cerc})} = 3.722$   
 $p_{2b} = 0.075; \omega_{2b(\text{othprim})} = 1,$   
 $\omega_{2b(\text{cerc})} = 3.722$   
Pos16, Pos37, Pos55, Pos110, Pos 113,  
Pos 126, Pos129, Pos158, Pos189,  
Pos193, Pos227, Pos236 (P>0.8)  
Model A' (foreground branch: cerc,  $\omega_2 = 1$ ) 40 -2690.06 3.98  $p_0 = 0.000, \omega_{0(\text{othprim})} = 0.155,$   
 $\omega_{0(\text{cerc})} = 0.155$   
 $p_1 = 0.000, \omega_{1(\text{othprim})} = 1, \omega_{1(\text{cerc})} = 1$   
 $p_{2a} = 0.870, \omega_{2a(\text{othprim})} = 0.155,$   
 $\omega_{2a(\text{cerc})} = 1$   
 $p_{2b} = 0.130; \omega_{2b(\text{othprim})} = 1, \omega_{2b(\text{cerc})} = 1$

**14 non-primate mammals**

*Branch-specific models:*

Free ratio 53 -6627.75 3.10  
One ratio:  $\omega_0$  28 -6667.08 3.05  $\omega_0 = 0.176$   
Two ratio  $\omega_0, \omega_{\text{glires}}$  29 -6665.12 3.06  $\omega_0 = 0.172, \omega_{\text{glires}} = 1.209$   
Two ratio  $\omega_0, \omega_{\text{glires}}=1$  28 -6665.13 3.06  $\omega_0 = 0.172, \omega_{\text{glires}} = 1$

*Site-specific models*

M1a (neutral) 29 -6528.53 3.23  $p_0 = 0.792, p_1 = 0.208$   
 $\omega_0 = 0.079, \omega_1 = 1$   
M2a (selection) 31 -6528.53 3.23  $p_0 = 0.792, p_1 = 0.151, p_2 = 0.057$   
 $\omega_0 = 0.079, \omega_1 = 1, \omega_2 = 1$   
M3 (discrete) 32 -6507.41 3.08  $p_0 = 0.616, p_1 = 0.282, p_2 = 0.102$   
 $\omega_0 = 0.035, \omega_1 = 0.334, \omega_2 = 0.958$   
M7 (beta) 29 -6510.06 3.06  $p = 0.320, q = 1.203$   
M8 (beta&  $\omega$ ) 31 -6507.87 3.08  $p_0 = 0.915, p = 0.445, q = 2.645$   
 $(p_1 = 0.085), \omega = 1$   
Pos12, Pos38, Pos235, Pos238,  
Pos251, (P>0.7)

*Branch-site models:*

|                                                               |    |          |      |                                                                                                                                                                                                                                                                                                                                                                                                                            |
|---------------------------------------------------------------|----|----------|------|----------------------------------------------------------------------------------------------------------------------------------------------------------------------------------------------------------------------------------------------------------------------------------------------------------------------------------------------------------------------------------------------------------------------------|
| Model A (foreground branch: <i>glires</i> )                   | 31 | -6526.16 | 3.23 | $p_0 = 0.783$ , $\omega_{0(\text{othmam})} = 0.079$ ,<br>$\omega_{0(\text{glires})} = 0.079$ ;<br>$p_1 = 0.198$ , $\omega_{1(\text{othmam})} = 1$ , $\omega_{1(\text{glires})} = 1$<br>$p_{2a} = 0.015$ , $\omega_{2a(\text{othmam})} = 0.079$ ,<br>$\omega_{2a(\text{glires})} = 42.11$<br>$p_{2b} = 0.004$ ; $\omega_{2b(\text{othmam})} = 1$ ,<br>$\omega_{2b(\text{glires})} = 42.11$<br>Pos 32, Pos 332 ( $P > 0.7$ ) |
| Model A' (foreground branch: <i>glires</i> , $\omega_2 = 1$ ) | 30 | -6528.04 | 3.23 | $p_0 = 0.677$ , $\omega_{0(\text{othmam})} = 0.079$ ,<br>$\omega_{0(\text{glires})} = 0.079$<br>$p_1 = 0.173$ , $\omega_{1(\text{othmam})} = 1$ , $\omega_{1(\text{glires})} = 1$<br>$p_{2a} = 0.120$ , $\omega_{2a(\text{othmam})} = 0.079$ ,<br>$\omega_{2a(\text{glires})} = 1$<br>$p_{2b} = 0.031$ ; $\omega_{2b(\text{othmam})} = 1$ , $\omega_{2b(\text{glires})} = 1$                                               |

**TAAR5**

*primate ORF and pseudogene lineages*

*Branch-specific models:*

|                                                                       |    |          |      |                                                                           |
|-----------------------------------------------------------------------|----|----------|------|---------------------------------------------------------------------------|
| A: Free ratio                                                         | 89 | -3115.27 | 3.34 |                                                                           |
| B: One ratio: $\omega_0$                                              | 46 | -3133.45 | 3.34 | $\omega_0 = 0.236$                                                        |
| C: Two ratios: $\omega_0$ , $\omega_\psi$                             | 47 | -3132.24 | 3.33 | $\omega_0 = 0.213$ , $\omega_\psi = 0.319$                                |
| D: Two ratios: $\omega_0$ , $\omega_\psi = 1$                         | 46 | -3144.46 | 3.49 | $\omega_0 = 0.213$ , $\omega_\psi = 1$                                    |
| E: Two ratios: $\omega_0 = 1$ , $\omega_\psi$                         | 46 | -3204.57 | 4.14 | $\omega_0 = 1$ , $\omega_\psi = 0.323$                                    |
| F: Three ratios: $\omega_0$ , $\omega_{\psi1}$ , $\omega_{\psi2}$     | 48 | -3129.08 | 3.33 | $\omega_0 = 0.213$ , $\omega_{\psi1} = \infty$ , $\omega_{\psi2} = 0.285$ |
| G: Three ratios: $\omega_0$ , $\omega_{\psi1} = 1$ , $\omega_{\psi2}$ | 47 | -3130.32 | 3.32 | $\omega_0 = 0.213$ , $\omega_{\psi1} = 1$ , $\omega_{\psi2} = 0.285$      |
| H: Three ratios: $\omega_0$ , $\omega_{\psi1}$ , $\omega_{\psi2} = 1$ | 47 | -3143.21 | 3.50 | $\omega_0 = 0.213$ , $\omega_{\psi1} = \infty$ , $\omega_{\psi2} = 1$     |

*primate ORF lineages*

*Branch-specific models:*

|                                                    |    |          |      |                                                                                                               |
|----------------------------------------------------|----|----------|------|---------------------------------------------------------------------------------------------------------------|
| Free ratio                                         | 77 | -2684.71 | 3.35 |                                                                                                               |
| One ratio: $\omega_0$                              | 40 | -2696.73 | 3.35 | $\omega_0 = 0.213$                                                                                            |
| Two ratios: $\omega_0$ , $\omega_{\text{hcg}}$     | 41 | -2694.42 | 3.37 | $\omega_0 = 0.204$ , $\omega_{\text{hcg}} = 0.537$                                                            |
| Two ratios: $\omega_0$ , $\omega_{\text{hcg}} = 1$ | 40 | -2695.07 | 3.39 | $\omega_0 = 0.205$ , $\omega_{\text{hcg}} = 1$                                                                |
| Two ratios: $\omega_0$ , $\omega_{\text{rp}}$      | 41 | -2695.50 | 3.37 | $\omega_0 = 0.213$ , $\omega_{\text{rp}} = 0.543$                                                             |
| Two ratios: $\omega_0$ , $\omega_{\text{rp}} = 1$  | 40 | -2695.71 | 3.37 | $\omega_0 = 0.213$ , $\omega_{\text{rp}} = 1$                                                                 |
| <i>Site-specific models:</i>                       |    |          |      |                                                                                                               |
| M1a (neutral)                                      | 41 | -2692.46 | 3.41 | $p_0 = 0.905$ , $p_1 = 0.095$<br>$\omega_0 = 0.151$ , $\omega_1 = 1$                                          |
| M2a (selection)                                    | 43 | -2692.46 | 3.41 | $p_0 = 0.905$ , $p_1 = 0.063$ , $p_2 = 0.032$<br>$\omega_0 = 0.151$ , $\omega_1 = 1$ , $\omega_2 = 1$         |
| M3 (discrete)                                      | 44 | -2691.44 | 3.41 | $p_0 = 0.353$ , $p_1 = 0.636$ , $p_2 = 0.010$<br>$\omega_0 = 0.000$ , $\omega_1 = 0.321$ , $\omega_2 = 2.520$ |
| M7 (beta)                                          | 41 | -2691.96 | 3.40 | $p = 0.616$ , $q = 2.082$                                                                                     |
| M8 (beta& $\omega$ )                               | 43 | -2691.70 | 3.41 | $p_0 = 0.992$ , $p = 0.837$ , $q = 3.068$<br>( $p_1 = 0.008$ ), $\omega = 2.496$                              |

**14 non-primate mammals**

*Branch-specific models:*

|                              |    |          |      |                                                                      |
|------------------------------|----|----------|------|----------------------------------------------------------------------|
| Free ratio                   | 53 | -6044.80 | 3.45 |                                                                      |
| One ratio: $\omega_0$        | 28 | -6087.09 | 3.34 | $\omega_0 = 0.143$                                                   |
| <i>Site-specific models:</i> |    |          |      |                                                                      |
| M1a (neutral)                | 29 | -5959.23 | 3.64 | $p_0 = 0.814$ , $p_1 = 0.185$<br>$\omega_0 = 0.061$ , $\omega_1 = 1$ |

|                      |    |          |      |                                                                                                                              |
|----------------------|----|----------|------|------------------------------------------------------------------------------------------------------------------------------|
| M2a (selection)      | 31 | -5954.77 | 3.68 | $p_0 = 0.813, p_1 = 0.183, p_2 = 0.004$<br>$\omega_0 = 0.061, \omega_1 = 1, \omega_2 = 4.99$<br>Pos5*, Pos41 ( $P > 0.7$ )   |
| M3 (discrete)        | 32 | -5923.02 | 3.43 | $p_0 = 0.683, p_1 = 0.296, p_2 = 0.021$<br>$\omega_0 = 0.025, \omega_1 = 0.407, \omega_2 = 2.099$                            |
| M7 (beta)            | 29 | -5933.52 | 3.43 | $p = 0.239, q = 1.097$                                                                                                       |
| M8 (beta& $\omega$ ) | 31 | -5924.12 | 3.43 | $p_0 = 0.988, p = 0.282, q = 1.532$<br>( $p_1 = 0.012$ ), $\omega = 2.769$<br>Pos5**, Pos41*, Pos12, Pos175<br>( $P > 0.8$ ) |

$p$ , number of free parameters;  $\ell$ , Log likelihood;  $\kappa$ , transition to transversion rate ratio;  $\omega$ ,  $d_N/d_S$  ratio;  $\omega_0$ , indicates  $\omega$  of all other branches (the ones that are not specifically labeled in a model);  $\omega_{\psi_1}$ ,  $\omega$  of branches being definitely under neutral evolution because of deleterious mutation (pseudogenization) in ancestor branch;  $\omega_{\psi_2}$ ,  $\omega$  of branches along which inactivating pseudogenization event occurred (see Figure 1-3  $\times$ );  $\omega_{\psi}$ ,  $\omega$  of all pseudogene branches ( $\psi_1$  plus  $\psi_2$ );  $\omega_{cerc}$ ,  $\omega$  of *Cercopithecinae* (see Figure 2 for labeling);  $\omega_{hcg}$ ,  $\omega$  of human, chimp and gorilla;  $\omega_{rp}$ ,  $\omega$  rhesus monkey and hamadryas baboon;  $\omega_{othprim}$ ,  $\omega$  of all other primates except species labeled as foreground branches in respective branch-site test of positive selection;  $\omega_{glires}$ ,  $\omega$  of *Glires* (see Figure S7B for labeling);  $\omega_{othmam}$ ,  $\omega$  of all other mammals except *Glires* labeled as background branches in branch-site test of positive selection;  $\infty$ ,  $\omega$  estimated to be infinite generated by  $d_S=0$  (absence of synonymous changes); \* indicates  $P > 0.95$ ; \*\* indicates  $P > 0.99$ )
