# Supplementary material for: Structural and Functional Evolution of the Trace Amine-Associated Receptors TAAR3, TAAR4 and TAAR5 in Primates
Source: PubMed Central journal article supplement (PMC2886124; doi:10.1371/journal.pone.0011133), 2010-06-15
Supplement: pone.0011133.s015.pdf [file pone.0011133.s015.pdf]

| models compared                             |                               | M0 (one ratio)<br>vs. M3 (discrete) | M1a (neutral) vs.<br>M2a (selection) | M7 (beta) vs. M8<br>(beta& $\omega$ ) |          |
|---------------------------------------------|-------------------------------|-------------------------------------|--------------------------------------|---------------------------------------|----------|
| <b>TAAR3</b><br><i>primate ORF lineages</i> | df                            | 4                                   | 2                                    | 2                                     |          |
|                                             | 2 $\Delta\ell$                | 19.13                               | 0.00                                 | 0.00                                  |          |
|                                             | P-value                       | 0.0007                              | 1                                    | 1                                     |          |
|                                             | <i>14 non-primate mammals</i> | df                                  | 4                                    | 2                                     | 2        |
|                                             |                               | 2 $\Delta\ell$                      | 246.12                               | 0.00                                  | 0.01     |
|                                             |                               | P-value                             | < 0.0001                             | 1                                     | 0.9950   |
| <b>TAAR4</b><br><i>primate ORF lineages</i> | df                            | 4                                   | 2                                    | 2                                     |          |
|                                             | 2 $\Delta\ell$                | 27.52                               | 0.00                                 | 1.96                                  |          |
|                                             | P-value                       | < 0.0001                            | 1                                    | 0.3753                                |          |
|                                             | <i>14 non-primate mammals</i> | df                                  | 4                                    | 2                                     | 2        |
|                                             |                               | 2 $\Delta\ell$                      | 319.34                               | 0.00                                  | 4.40     |
|                                             |                               | P-value                             | < 0.0001                             | 1                                     | 0.1108   |
| <b>TAAR5</b><br><i>primate ORF lineages</i> | df                            | 4                                   | 2                                    | 2                                     |          |
|                                             | 2 $\Delta\ell$                | 10.58                               | 0.00                                 | 0.52                                  |          |
|                                             | P-value                       | 0.0317                              | 1                                    | 0.7711                                |          |
|                                             | <i>14 non-primate mammals</i> | df                                  | 4                                    | 2                                     | 2        |
|                                             |                               | 2 $\Delta\ell$                      | 328.13                               | 8.94                                  | 18.82    |
|                                             |                               | P-value                             | < 0.0001                             | 0.0114                                | < 0.0001 |

LRT tests were performed between nested models. df, degrees of freedom, equal to differences in the number of parameters between models; 2 $\Delta\ell$ , likelihood ratio statistic is distributed approximately as  $\chi^2$
